# Supplementary material for: Cardiac glycosides target barrier inflammation of the vasculature, meninges and choroid plexus
Source: PubMed Central journal article supplement (PMC7910294; doi:10.1038/s42003-021-01787-x), 2021-02-26
Supplement: 42003_2021_1787_MOESM1_ESM.pdf [file 42003_2021_1787_MOESM1_ESM.pdf]

## Supplementary Material

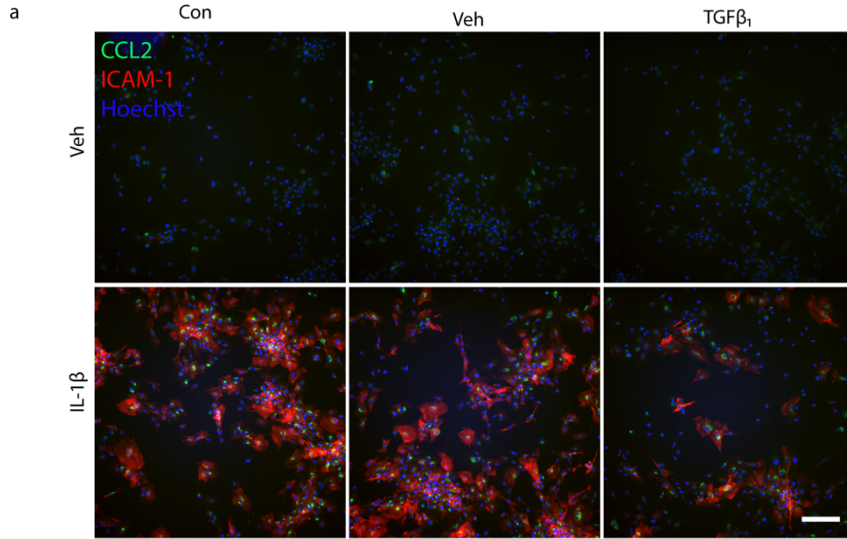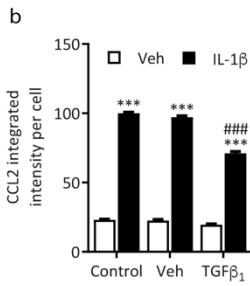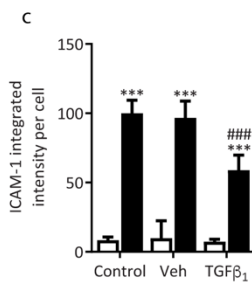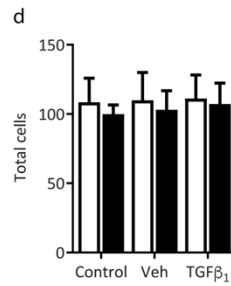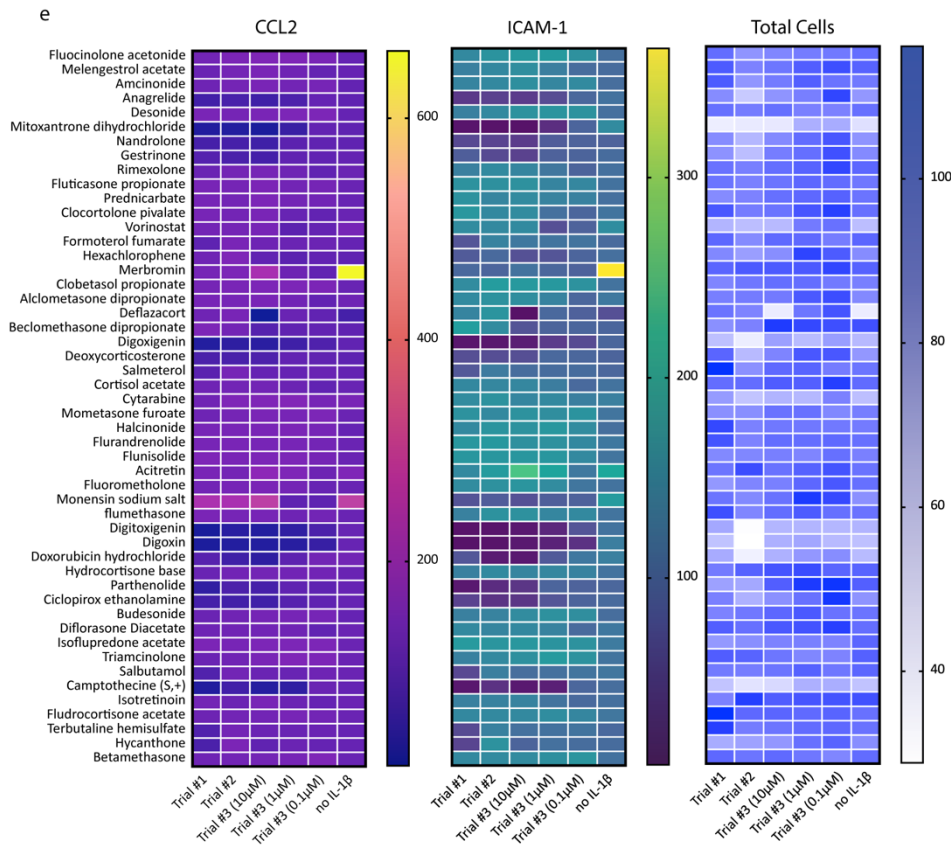

Fig. S1. Consistency of hits and controls across drug screen trials in pericytes. (a-d) Validation of controls used for drug screen shows TGF $\beta_1$  (10 ng/mL), a known inhibitor of CCL2 and ICAM-1 expression in pericytes is consistent across all drug plates, \*\*\* $p < 0.001$ , compared to control, vehicle treated ### $p < 0.001$ , compared to control, IL-1 $\beta$  treated. Case used : H239 e) Potential drug hits from three trials (including trial 3, at three concentrations, and one trial with no IL-1 $\beta$  treatment) by immunocytochemical analysis of CCL2, ICAM-1 and total cell counts, normalized to IL-1 $\beta$  treatment for Trial 1, 2, and 3, and no IL-1 $\beta$  trial normalized to vehicle (DMSO) control. Case used: H238.

We also performed Z-Score analyses to determine the degree of plate variability for our pericyte inflammatory screening using CCL2 and ICAM1 (data below). We analyzed the normalized data sets of Vehicle and Vehicle + IL1 $\beta$  for CCL2 (Z-score = 0.43) and ICAM1 (Z-score = 0.15). This analysis shows that CCL2 expression is more consistent across plates than ICAM1, and therefore a superior assay measure. Despite this difference in Z-scores when we correlated (using Pearson's correlation coefficient) the normalized intensity values for CCL2 against ICAM1 for all drug treatments across all plates we observed a very strong positive correlation of  $r=0.9508$ ,  $P < 0.0001$ , suggesting that both measures were strongly associated with each other. Although these Z-scores are low, this may reflect the "wild-type" nature of primary cells compared with artificially generated immortalized cell lines. The raw data for this analysis is provided in Dataset 15 raw data for supplementary figure 1.

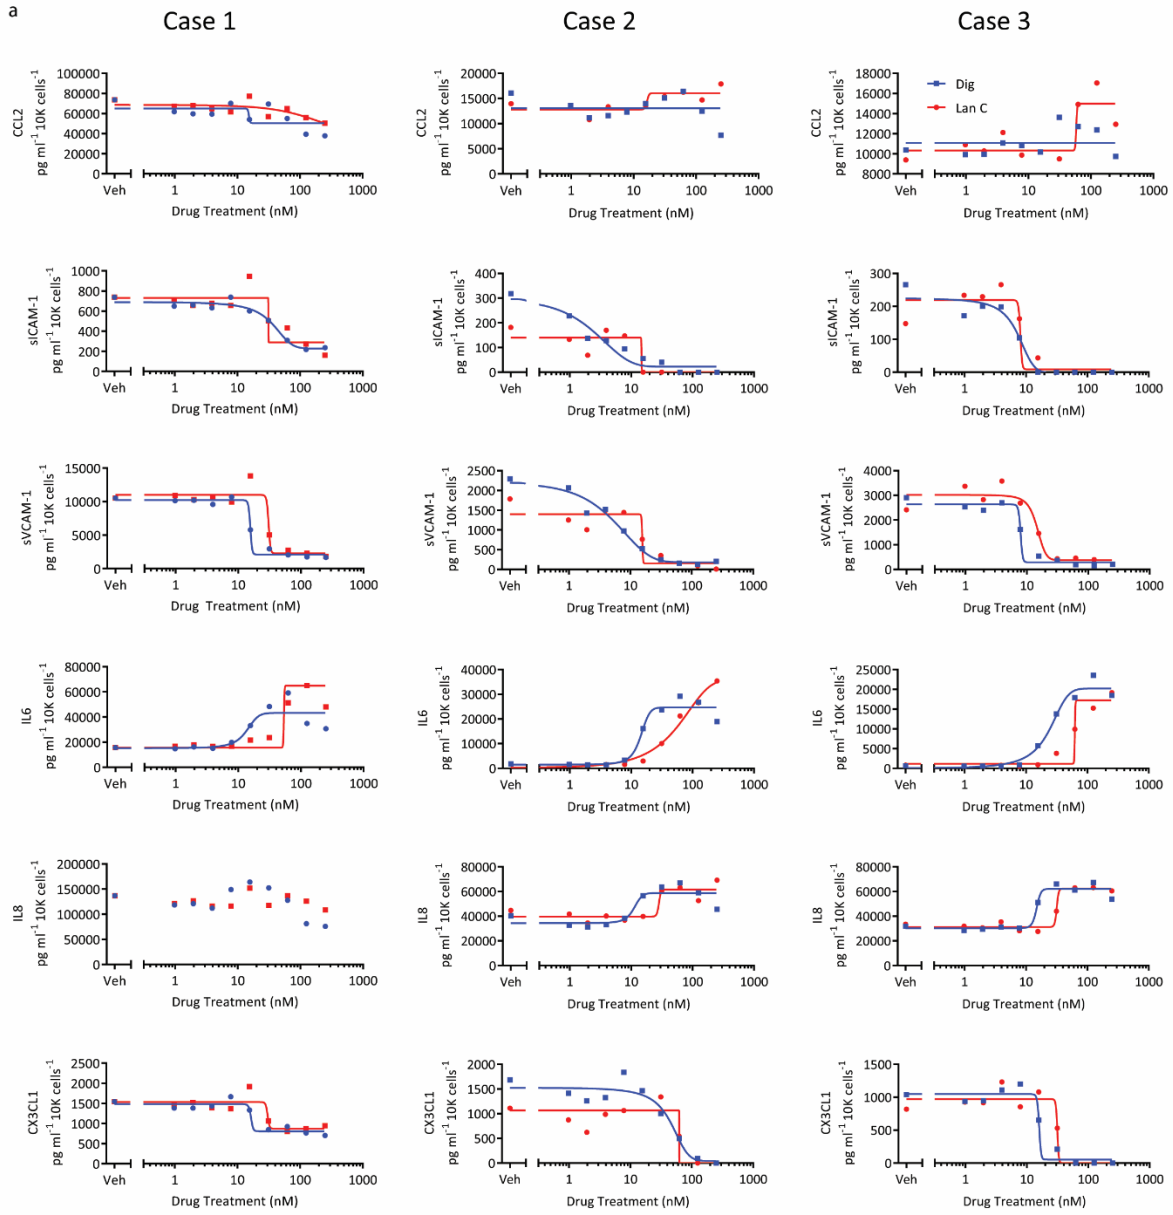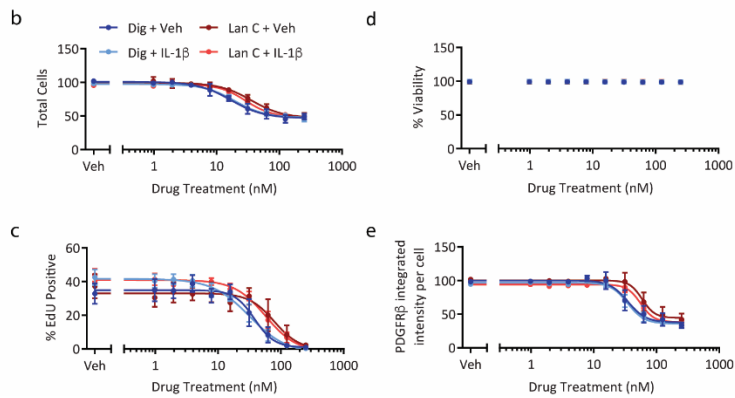

Fig. S2. Concentration response of pericytes to digoxin or lanatoside C in the presence of IL-1 $\beta$ .

a) Pericytes were pretreated with digoxin or lanatoside for 24 hours prior to IL-1 $\beta$  stimulation. Secretions were quantified with cytometric bead array and normalized to total cells. Case 1 E213, Case 2 E215, Case 3 E216. b) Cells treated as above were assessed for proliferation (EdU), viability (LDH), and PDGFR $\beta$  expression. Cases used: E206, E213, E214.

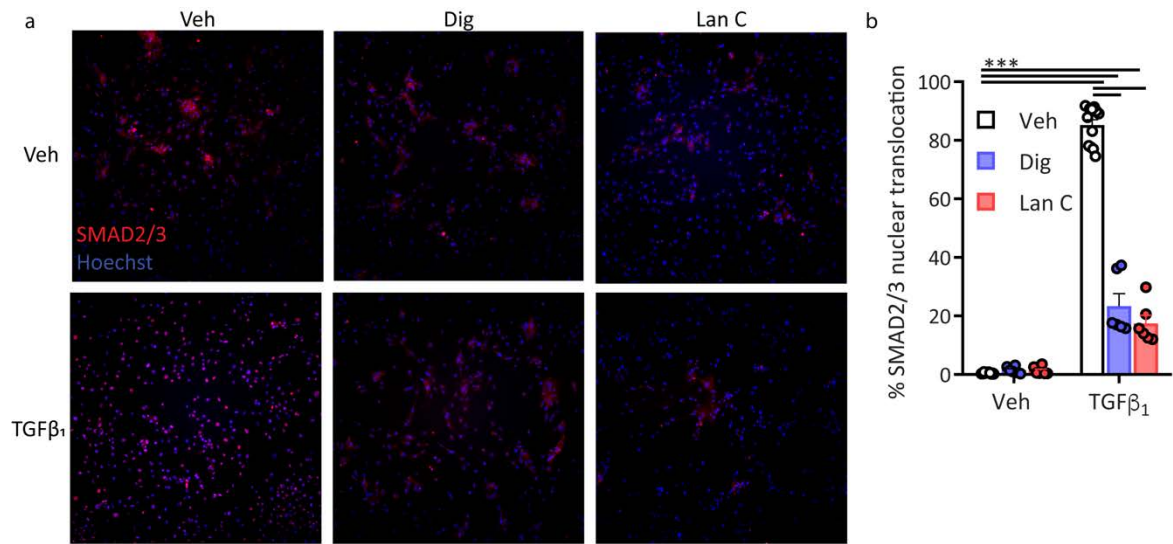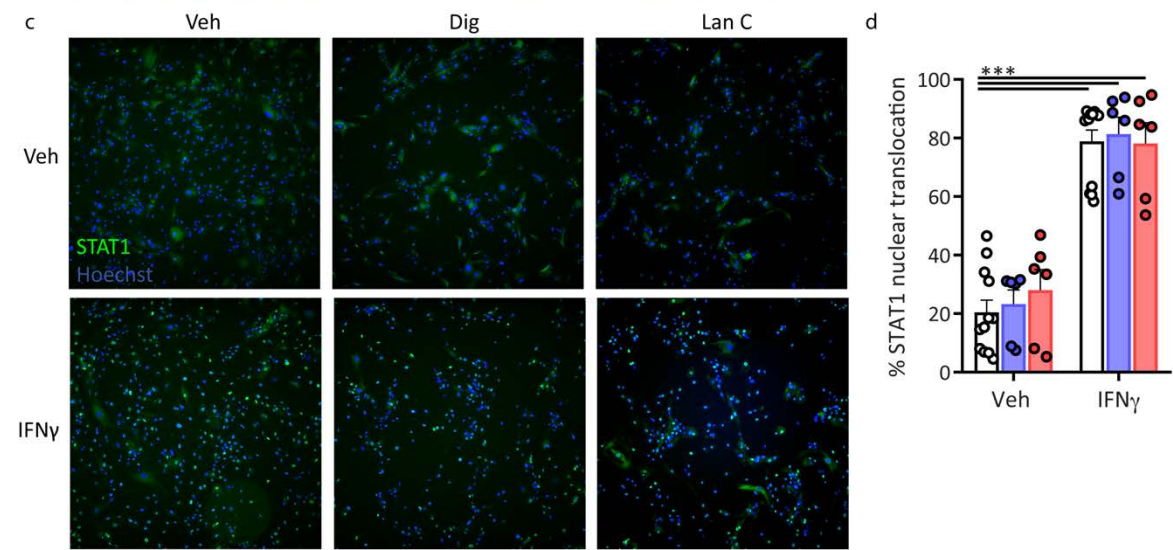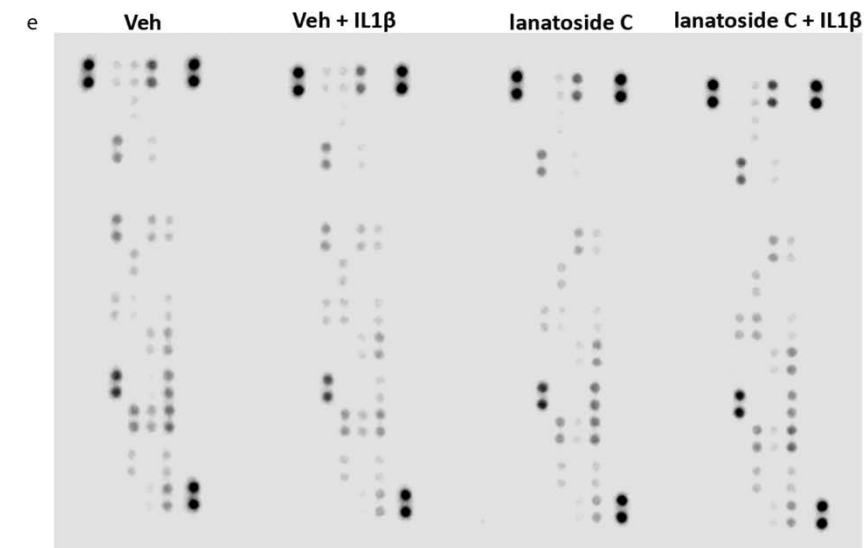

Fig. S3. Pericytes pre-treated with digoxin (0.1  $\mu$ M) or lanatoside C (1  $\mu$ M) for 24 hours were treated with TGF $\beta$ <sub>1</sub> (1 ng/mL) for one hour and stained for SMAD2/3 (a) or IFN $\gamma$  (1 ng/mL) for one hour and stained for STAT1 (b). Quantification of nuclear translocation of SMAD 2/3 (c) or STAT1 (d), mean  $\pm$  S.E.M. \*\*\* $p$ <0.001, (n=3, cases used E203, E204, E213). (e) Blots from NF $\kappa$ B profiler arrays, quantified in Figure 2.

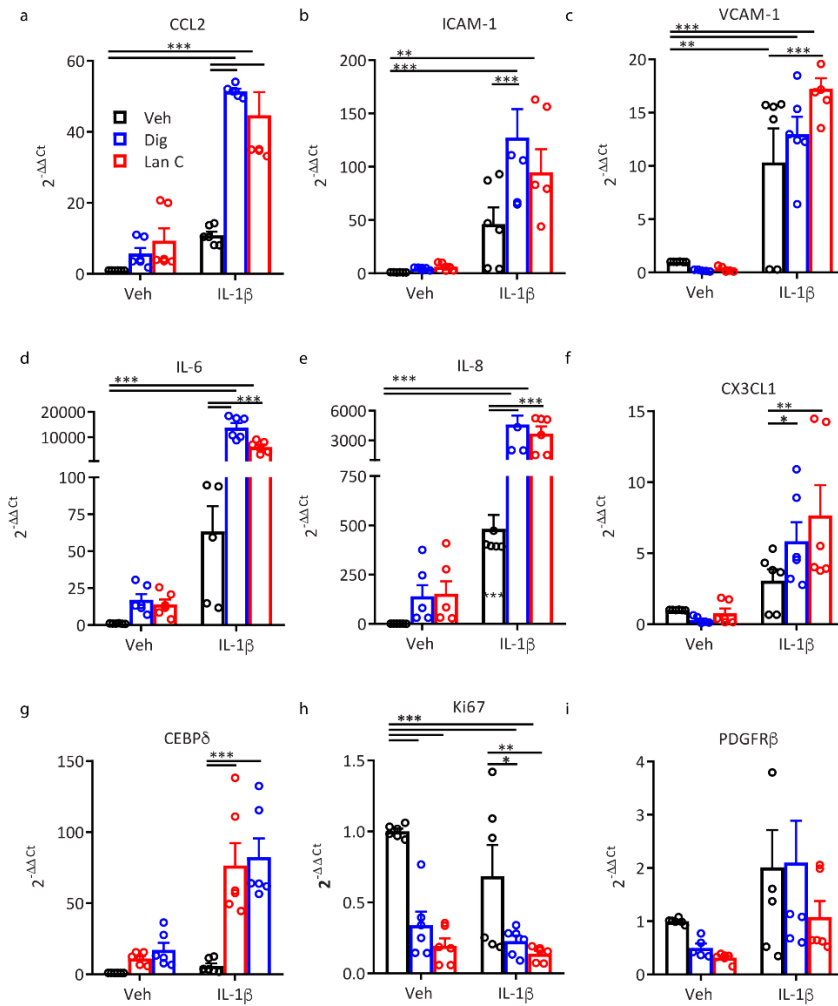

Fig S4. Cardiac glycosides do not block transcriptional activation of IL-1 $\beta$ -dependent inflammatory responses in pericytes. Cells were treated for 24 hours with digoxin (0.1  $\mu$ M) or lanatoside C (1  $\mu$ M) then treated with IL-1 $\beta$  for 24 hours. Statistical analysis performed using two-way ANOVA (n=3 cases, 2 experimental replicates), \*\*\* $p < 0.001$ , \*\* $p < 0.01$ , \* $p < 0.05$ . Cases used: E206, E213, E214.



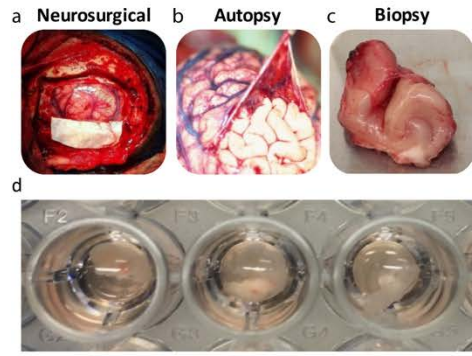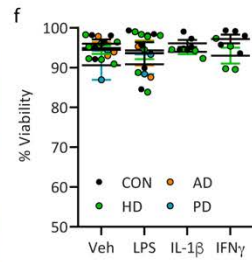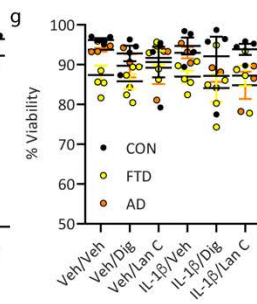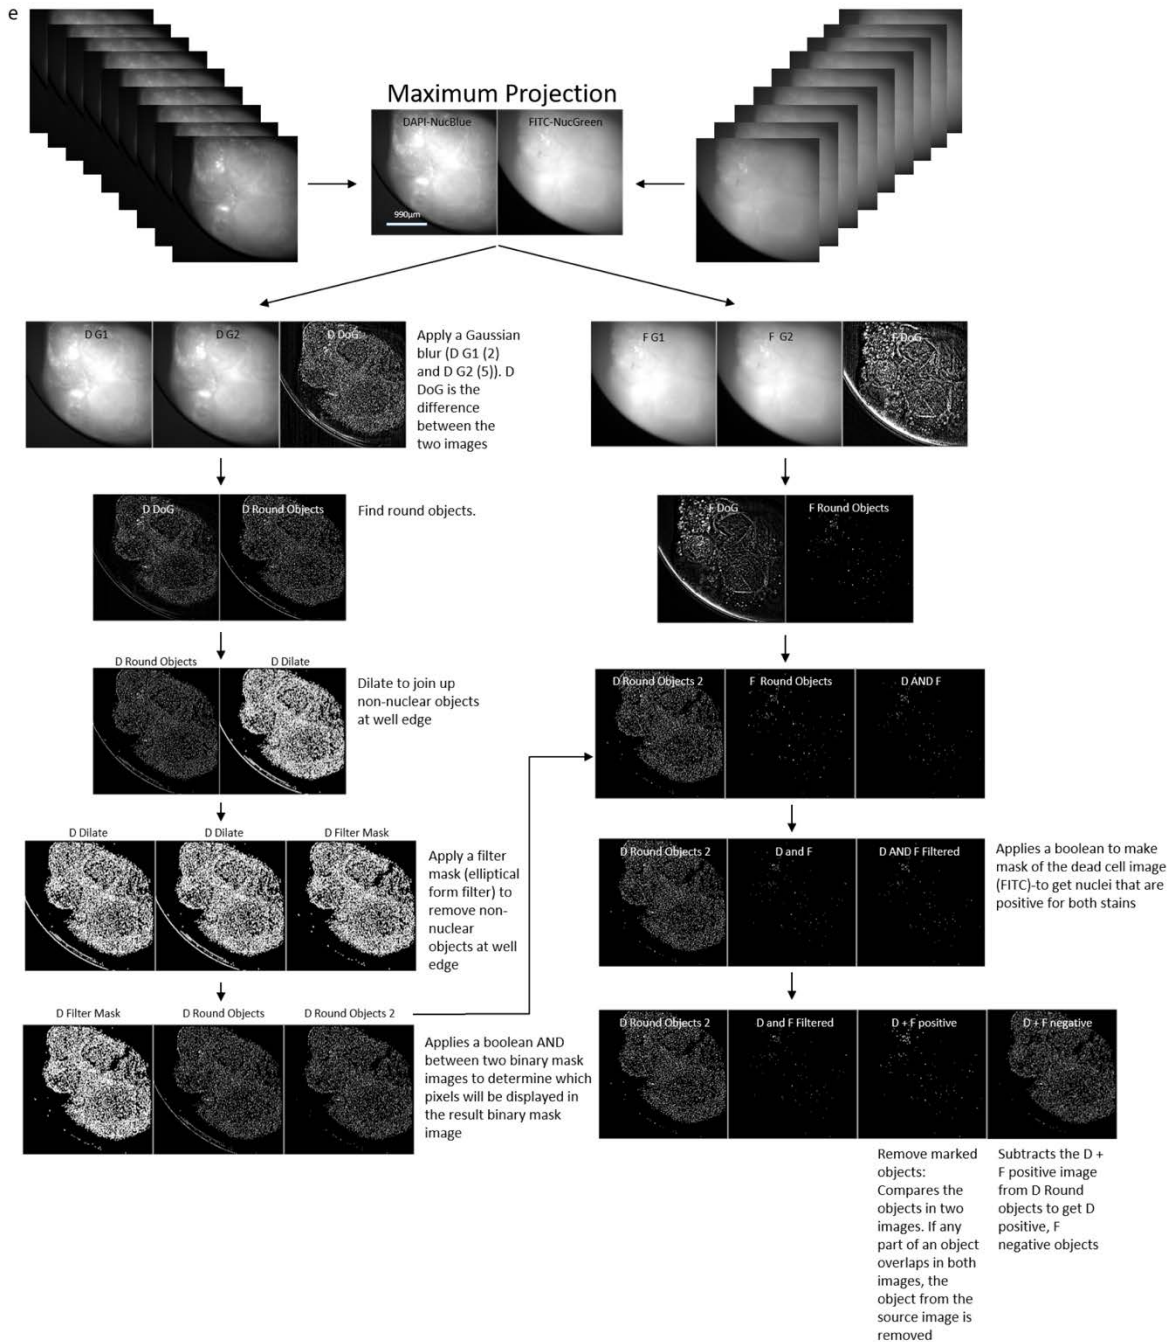

Fig S5. Development of leptomeningeal/choroid plexus explant cultures for ex vivo pharmacological studies. a-c) meninges are sourced from neurosurgeries for the treatment of epilepsy, autopsy or tumour biopsies. Tissue is diced into 2 mm<sup>2</sup> and placed into cell culture dishes with DMEM/F12 (d), 10% FBS, 1% PSG (penicillin 100U/ml, streptomycin 100 µg/ml, L-glutamine 0.29 mg/ml) at 37 °C with 5% CO<sub>2</sub>. e) Viability analysis was performed using the custom module editor function of MetaXpress software to quantify live and dead cells from Z-stacks of explants. f-g) Quantification of explants viability after treatment with cytokines for 24 hours (10 ng/mL), or with pretreatment of digoxin or lanatoside C (10 µM) for 24 hours, followed by IL-1β (10 ng/mL) for 24 hours. Cases used f) H253, HC171, PD85, AZ133, g) H253, FTD6, AZ133.

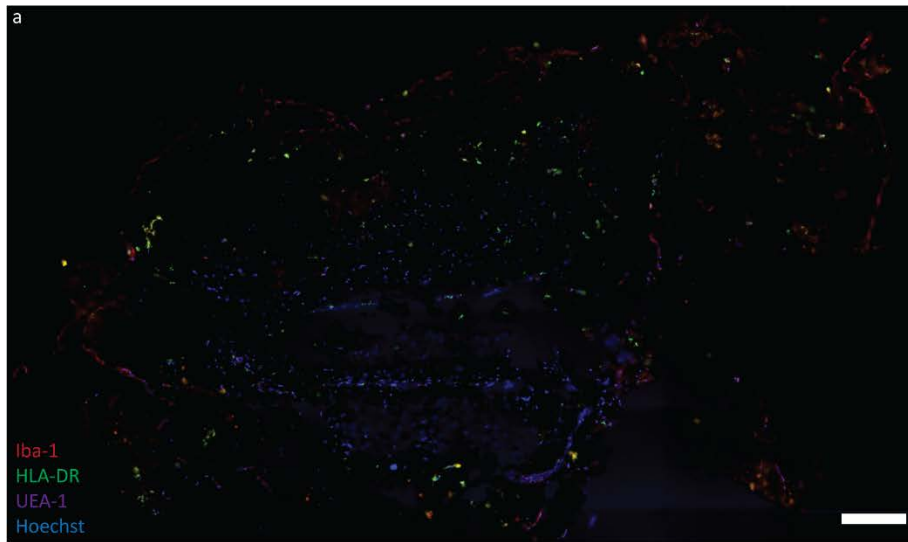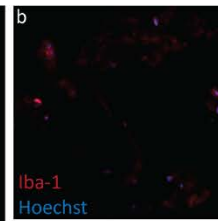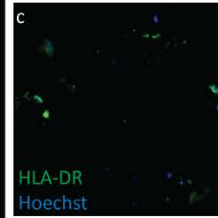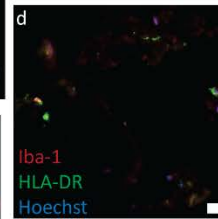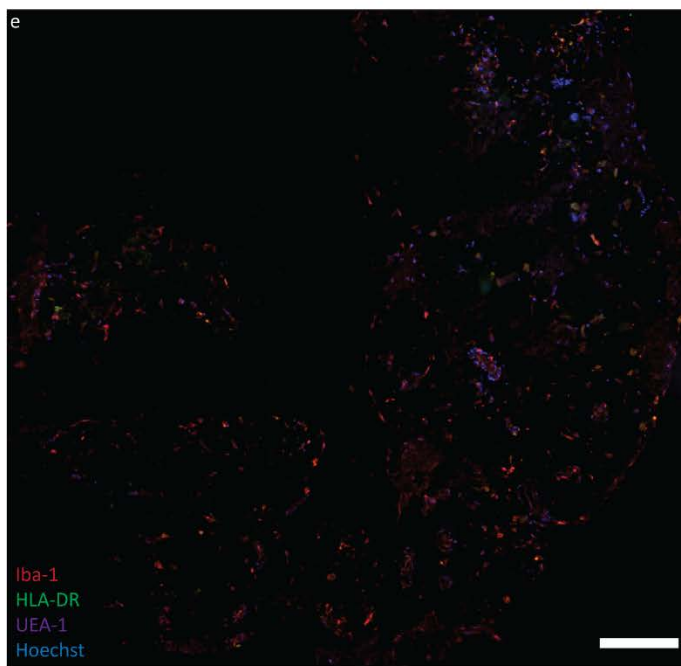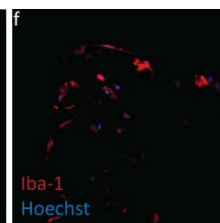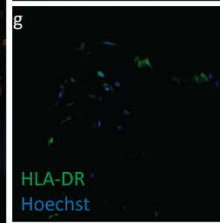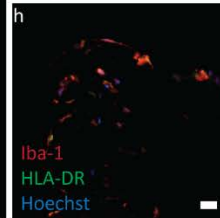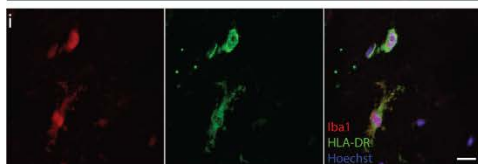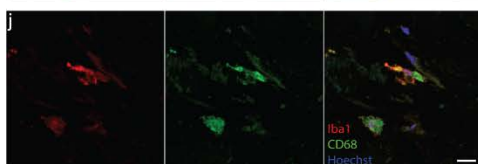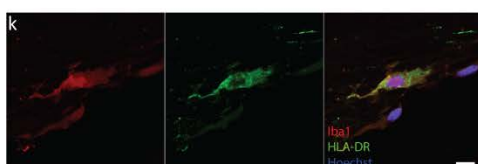

Fig. S6. Microglia/macrophage presence in leptomeningeal and choroid plexus explants. Immunohistochemical staining of microglial/ macrophage markers in leptomeningeal explants (a-b) (scale 200  $\mu\text{m}$  (a) and 20  $\mu\text{m}$  (b-d), and in choroid plexus explants (e-h) (scale = 200  $\mu\text{m}$  (e) and 20  $\mu\text{m}$  (F-H). i-k) confocal images demonstrating co-expression of Iba-1 with HLA-DR and CD68 (scale = 10  $\mu\text{m}$ ).

a

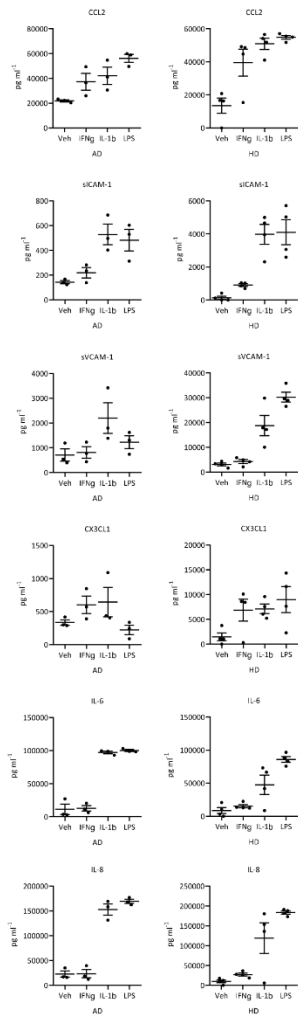

b

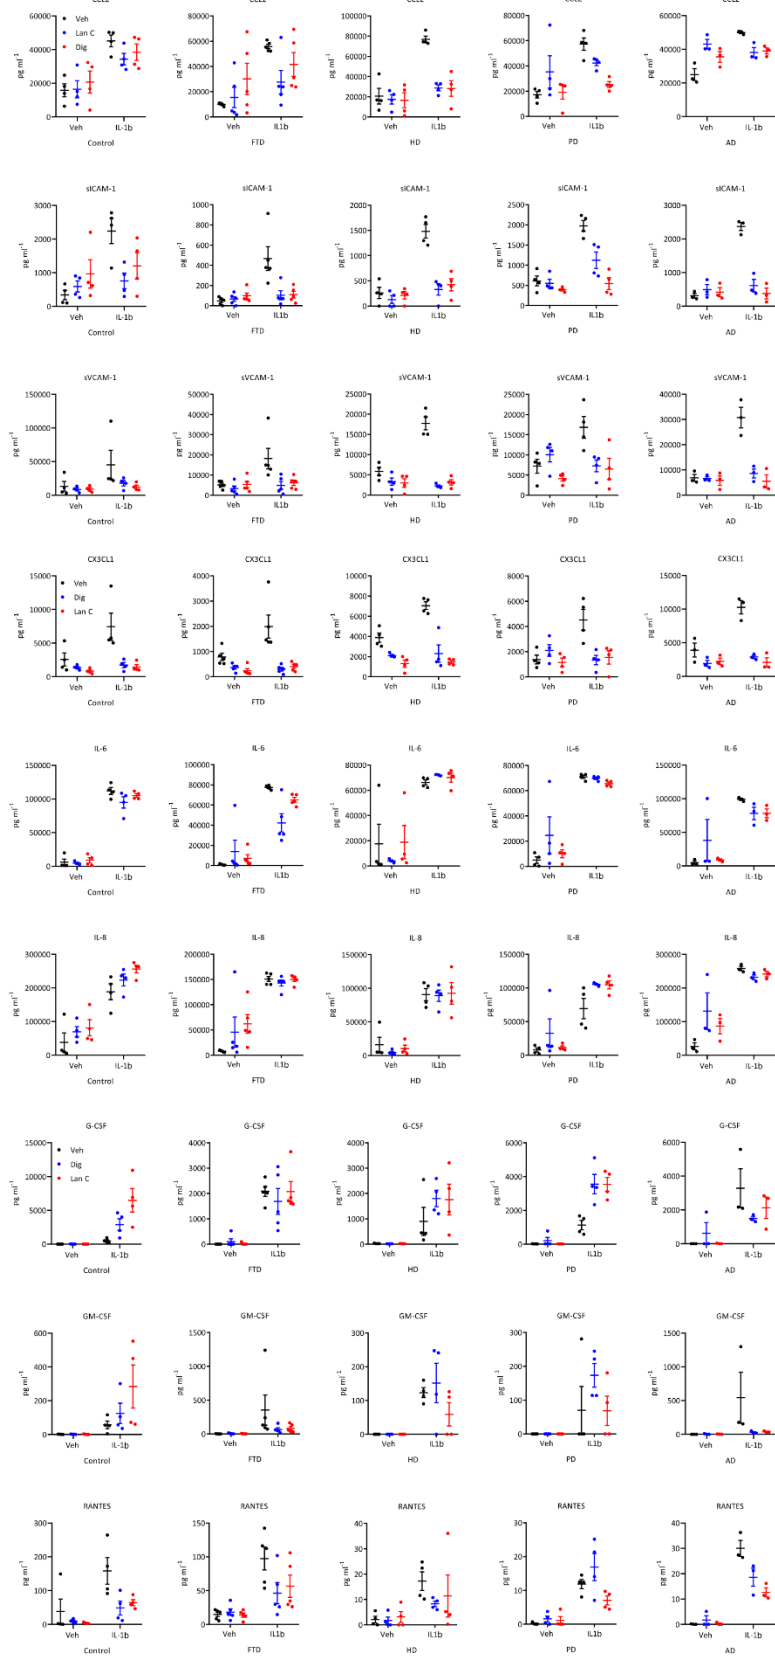

Fig S7. a) Raw cytokine concentration from leptomenigeal explants (LME) from two different donors treated with vehicle, IFN $\gamma$ , IL-1 $\beta$ , or LPS (10 ng/mL), for 24 hours. Cases used H250, AZ133. b) Raw cytokine concentrations from meningeal explants from five different donors LME cases treated with digoxin or lanatoside C (10  $\mu$ M) for 24 hours then IL-1 $\beta$  (10 ng/mL) for 24 hours. Each point is a single explant. Cases used: H253, FTD6, HC166, PD85, AZ133. (Control- neurologically normal, FTD - frontotemporal dementia, HD -Huntington's disease, PD -Parkinson's disease, AD -Alzheimer's disease). Cases used, H253, FTD6, HC166, PD85, AZ133.

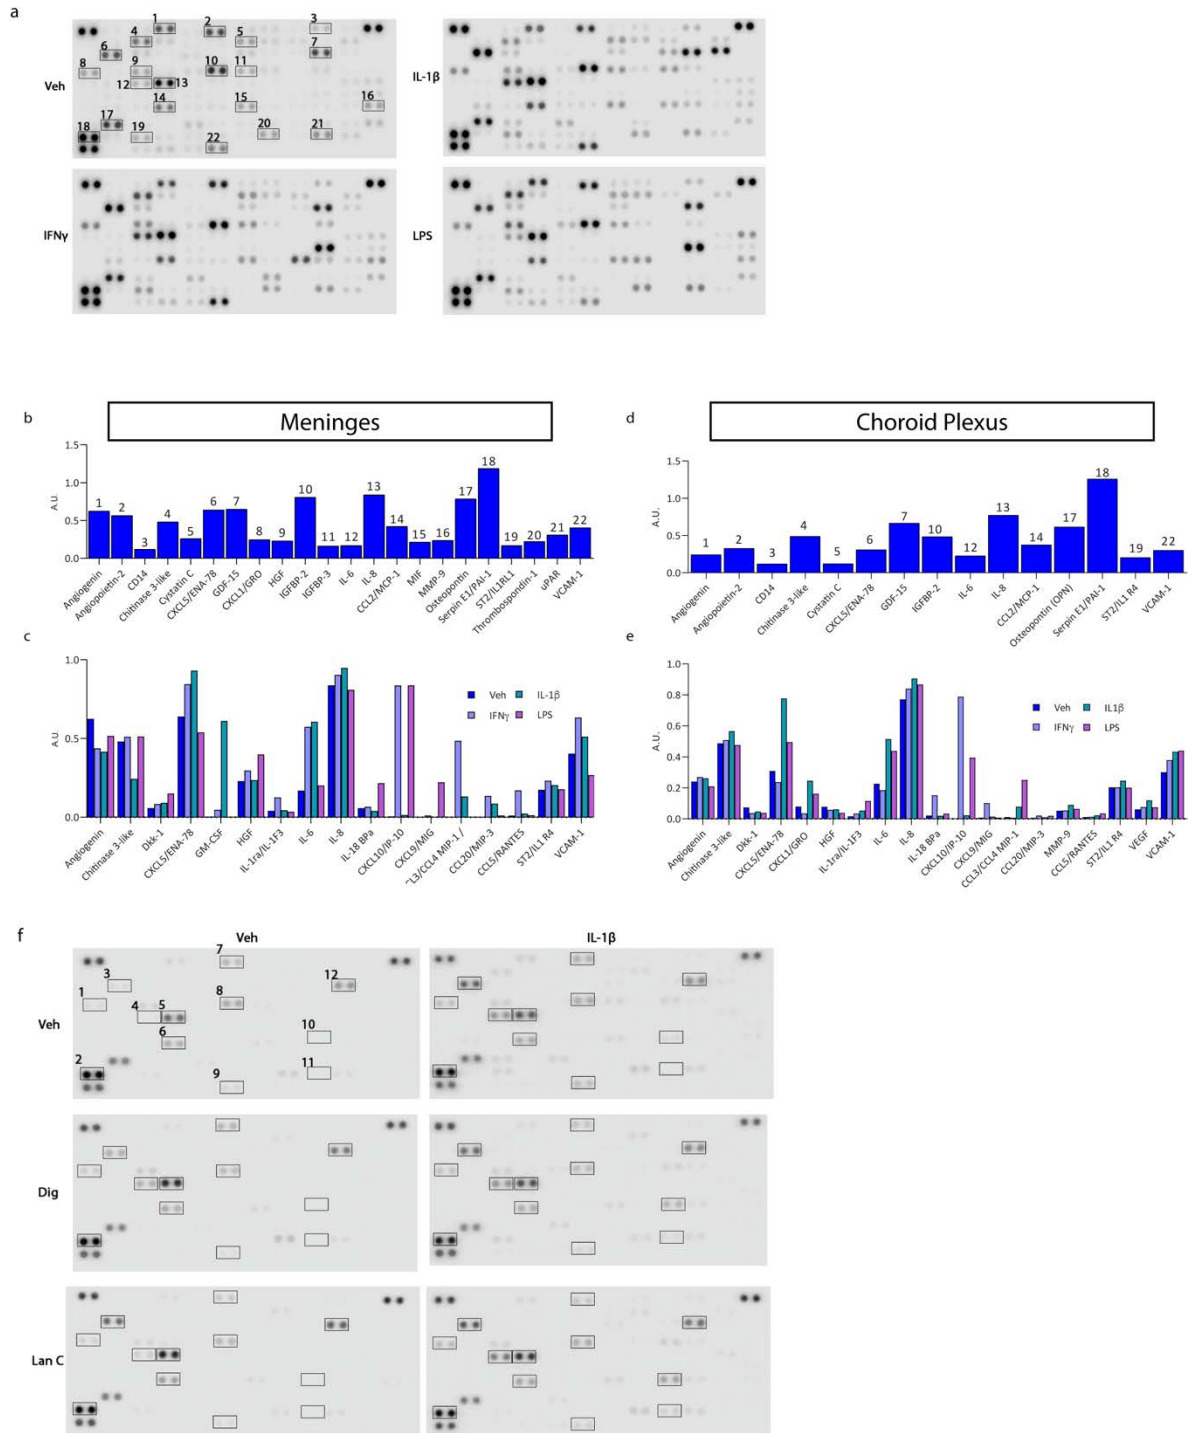

Fig S8. Human cytokine proteome profiler original blots and select hits comparison.

a) Representative blots of LME conditioned media (from Figure 5) exposed to vehicle (Veh), IFN $\gamma$ , IL-1 $\beta$ , or LPS after 24 hours. Normalized intensity values above an arbitrary threshold under basal conditions in LME (b) or CPE (d). Select secreted proteins that are modified by cytokine treatment in LME (d), or CPE (e). f) Proteome profilers were used to characterise the IL-1 $\beta$  (10 ng/mL) induced changes in secretions from meningeal explants in response with either digoxin or lanatoside pre-treatment (10  $\mu$ M),

representative blots from one case, pooled secretions from 5 explants. (1-CXCL1, 2- SerpinE1, 3-CXCL5, 4-IL-6, 5-IL-8, 6-CCL2, 7-Ang-2, 8-IGFBP2, 9-VCAM-1, 10-MIP1 $\alpha$ , 11-TNF $\alpha$ , 12-GDF-15).



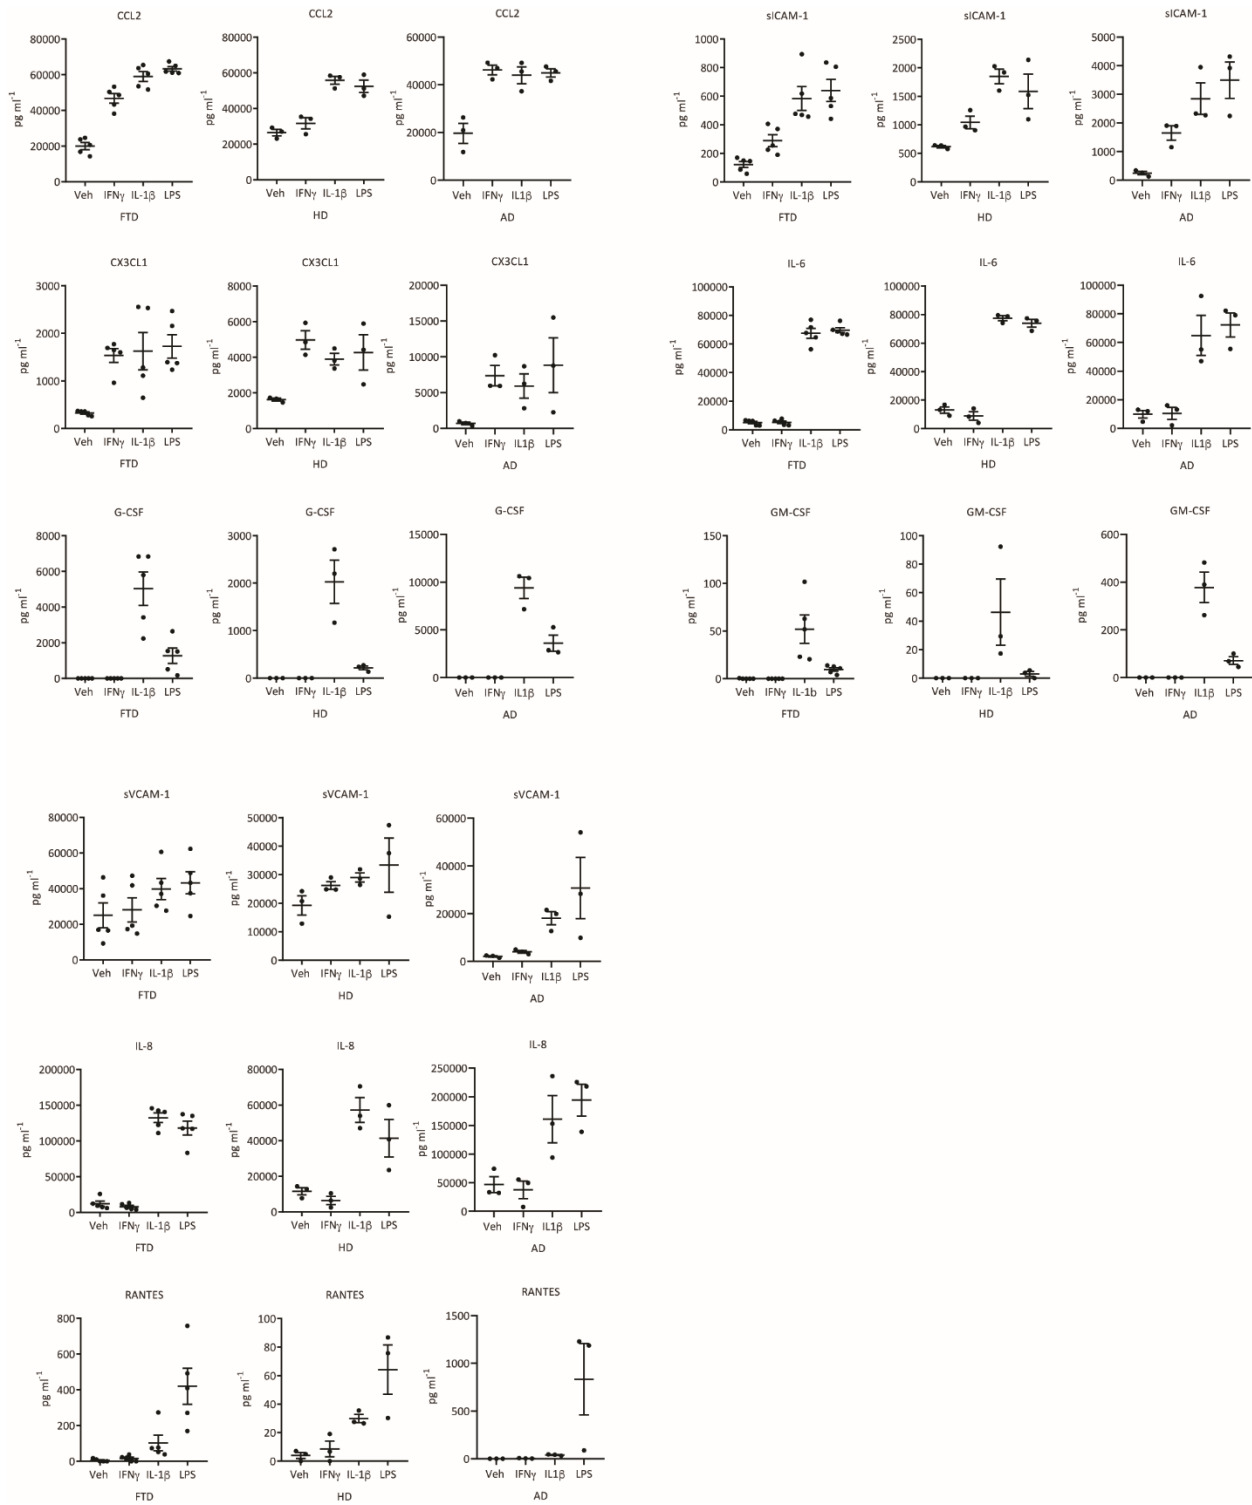

Fig. S9: Raw CBA data from analysis of choroid plexus secretions.

Raw cytokine concentrations from choroid plexus explants from three individual donors (n=3 explants per case) that were treated with vehicle, IFN $\gamma$ , IL-1 $\beta$  or LPS (10 ng/mL), for 24 hours. Cases used: FTD6, HC166, AZ133.

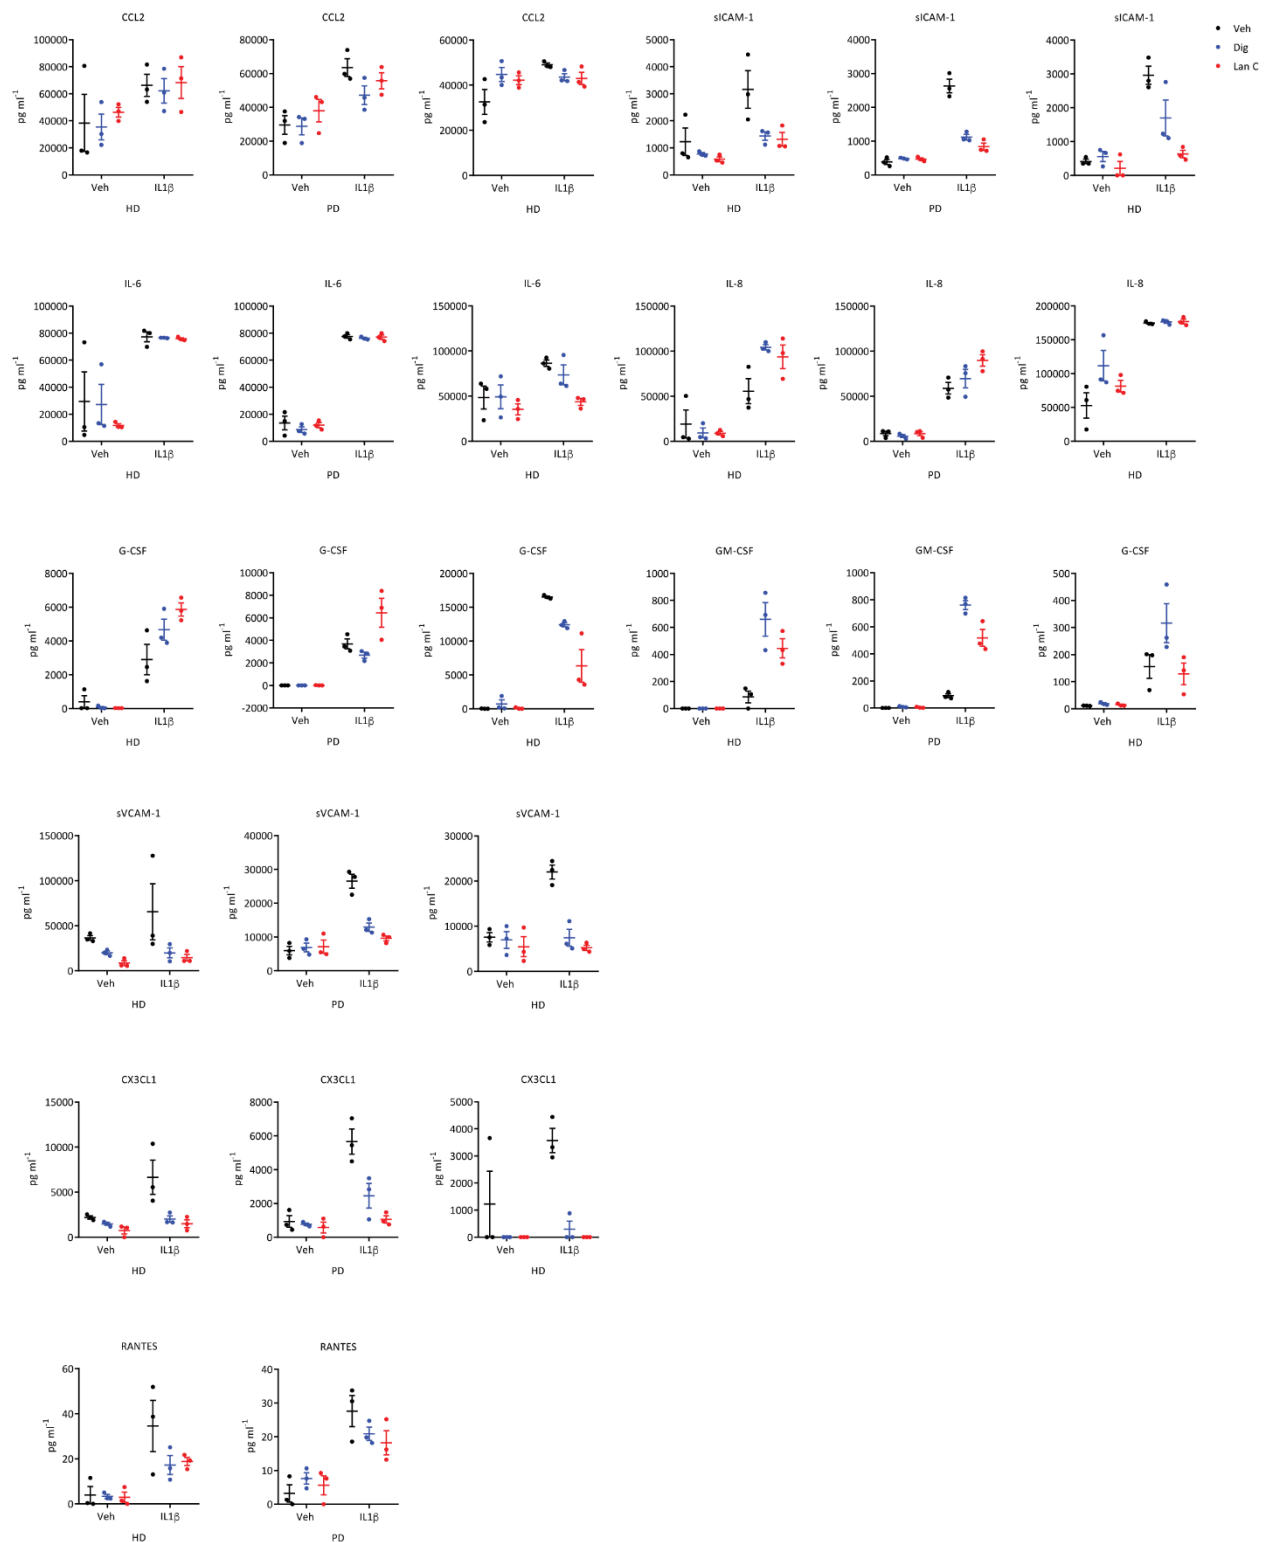

Figure S10: Raw CBA data from analysis of choroid plexus explant secretions (from Figure 8) treated with vehicle, digoxin or lanatoside C (both 10  $\mu$ M) for 24 hours followed by IL1 $\beta$  (10 ng/mL) for 24 hours.

Table S1. Human tissue sources used in this study.

| Case  | Tissue source | Confirmed diagnosis     | Age | Sex | PMD (hr) | Experiment | Time in culture |
|-------|---------------|-------------------------|-----|-----|----------|------------|-----------------|
| E203  | MTG           | Temporal lobe epilepsy  | 46  | F   | <1       | ML         | Passage 4-9     |
| E204  | MTG           | Temporal lobe epilepsy  | 45  | F   | <1       | ML         | Passage 4-9     |
| E206  | MTG           | Temporal lobe epilepsy  | 29  | F   | <1       | ML         | Passage 4-9     |
| E208  | MTG           | Temporal lobe epilepsy  | 52  | F   | <1       | ML         | Passage 4-9     |
| E211  | MTG           | Temporal lobe epilepsy  | 51  | F   | <1       | ML         | Passage 4-9     |
| E213  | MTG           | Temporal lobe epilepsy  | 23  | M   | <1       | ML         | Passage 4-9     |
| E214  | MTG           | Temporal lobe epilepsy  | 35  | F   | <1       | ML         | Passage 4-9     |
| E215  | MTG           | Temporal lobe epilepsy  | 29  | F   | <1       | ML         | Passage 4-9     |
| E216  | MTG           | Temporal lobe epilepsy  | 38  | M   | <1       | ML         | Passage 4-9     |
| SS37  | TL            | Paediatric epilepsy     | 9   | M   | <1       | ML         | Passage 1       |
| SS42  | TL            | Paediatric epilepsy     | 8   | M   | <1       | ML         | Passage 1       |
| SS48  | TL            | Paediatric epilepsy     | 10  | F   | <1       | ML         | Passage 1       |
| SS50  | TL            | Paediatric epilepsy     | 3   | F   | <1       | ML         | Passage 1       |
| SS54  | TL            | Paediatric epilepsy     | 25w | M   | <1       | ML         | Passage 1       |
| H238  | MTG           | normal                  | 63  | F   | 16       | ML, LME    | Passage 4-9     |
| H239  | MTG           | normal                  | 64  | M   | 15.5     | ML, LME    | Passage 4-9     |
| H250  | meninges      | normal                  | 93  | F   | 19       | LME        | 7 weeks         |
| H253  | meninges      | normal                  | 96  | M   | 24       | LME, CPE   | 14 weeks        |
| FTD6  | Meninges, ChP | Frontotemporal dementia | 76  | M   | 7        | LME, CPE   | 8 weeks         |
| HC166 | Meninges, ChP | Huntington's disease    | 84  | F   | 22.5     | LME, CPE   | 9 weeks         |
| HC171 | Meninges, ChP | Huntington's disease    | 51  | M   | 24       | LME, CPE   | 5 weeks         |
| PD85  | meninges/ChP  | Parkinson's disease     | 73  | M   | 4        | LME, CPE   | 9 weeks         |
| AZ129 | meninges      | Alzheimer's disease     | 81  | M   | 4.5      | LME        | 9 weeks         |
| AZ133 | meninges/ChP  | Alzheimer's disease     | 96  | M   | 21       | LME, CPE   | 5 weeks         |

MTG-middle temporal gyrus, ML-monolayer cultures, ChP-choroid plexus, LME-leptomeningeal explants, CPE-choroid plexus explants

Table S2. Antibodies and stains used in this study.

| Antibody (species)                  | Catalogue Number (Source)            | Dilution                 |
|-------------------------------------|--------------------------------------|--------------------------|
| $\alpha$ SMA (mouse)                | IS611 (Dako)                         | 1/100 IHC                |
| CCL2 (MCP-1) (Rabbit)               | ab-9669 (Abcam)                      | 1/500 ICC                |
| CD31 (mouse)                        | M0823 (Dako)                         | 1/500 ICC, 1/100 IHC     |
| CD68 (KP1)(mouse)                   | Ab-955(Abcam)                        | 1/500 IHC                |
| CEBP $\delta$ (mouse)               | sc-365546 (Santa Cruz)               | 1/500 ICC                |
| Claudin-5 (rabbit)                  | ab131259 (Abcam)                     | 1/5000 ICC               |
| COL1A1 (mouse)                      | sc-293182 (Santa Cruz)               | 1/50 IHC                 |
| HLA-DR (mouse)                      | M0775 (Dako)                         | 1/1000 IHC               |
| IBA1 (goat)                         | ab-5076 (Abcam)                      | 1/500 IHC                |
| ICAM-1 (mouse)                      | sc-107 (Santa Cruz)                  | 1/500 ICC                |
| IL-6 (goat)                         | AF-206 (R&D Systems)                 | 1/2000 ICC               |
| KCNJ8/Kir6.1 (rabbit)               | PA5-56628                            | 1/100 IHC                |
| NF $\kappa$ Bp65 (rabbit)           | sc-107 (Santa Cruz)                  | 1/500 ICC                |
| PDGFR $\beta$ (goat)                | AF-385 (R&D Systems)                 | 1/2000 ICC<br>1/200 IHC  |
| PDGFR $\beta$ (rabbit)              | 3169 (Cell Signalling)               | 1/100 IHC                |
| PDLIM3 (rabbit)                     | PA5-52099 (Thermo Fisher Scientific) | 1/50 IHC                 |
| PU.1 (rabbit)                       | 2258 (Cell Signalling)               | 1/500 ICC                |
| SMAD2/3 (mouse)                     | sc-133098 (Santa Cruz)               | 1/500 ICC                |
| STAT1 (rabbit)                      | 14994 (Cell Signalling)              | 1/500 ICC                |
| Streptavidin Alexa Fluor 647        | S21374 (Invitrogen)                  | 2 mg/mL (1/500)          |
| Transthyretin /Pre-albumin (rabbit) | A0002 (Dako)                         | 1/1000                   |
| ZO-1 (mouse)                        | 339100 (Invitrogen)                  | 1/500 ICC                |
| Lectin (UEA-1)                      | L8262 (SIGMA)                        | 1/1000 IHC               |
| Hoechst 33258                       | SIGMA                                | 1/500 ICC<br>1/10000 IHC |

IHC-immunohistochemistry, ICC-immunocytochemistry

Table S3: Primers used for qPCR in this study.

| Gene          |    | Sequence                | Amplicon Length |
|---------------|----|-------------------------|-----------------|
| CEBP $\delta$ | Fw | TTCAGCGCCTACATCGACTC    | 80 bp           |
|               | Rv | TTGAAGAGGTCGGCGAAGAG    |                 |
| CCL2          | Fw | CAGCCAGATGCAATCAATGCC   | 190 bp          |
|               | Rv | TGGAATCCTGAACCCACTTCT   |                 |
| CX3CL1        | Fw | ATTCTTTCCTGAGGCTGGGC    | 74 bp           |
|               | Rv | GGTCTTGGAGGGCAGAGAAC    |                 |
| GAPDH         | Fw | CATGAGAAGTATGACAACAGCCT | 113 bp          |
|               | Rv | AGTCCTTCCACGATACCAAAGT  |                 |
| ICAM-1        | Fw | GAACCAGAGCCAGGAGACAC    | 84 bp           |
|               | Rv | GAGACCTCTGGCTTCGTCAG    |                 |
| IL-6          | Fw | TTCGGTCCAGTTGCCTTCTC    | 77 bp           |
|               | Rv | TCTTCTCCTGGGGGTACTGG    |                 |
| IL-8          | Fw | CAGAGACAGCAGAGCACACA    | 70 bp           |
|               | Rv | GTGAGATGGTTCCTTCCGGT    |                 |
| Ki67          | Fw | AGCGGAAGCTGGACGCAGAA    | 79 bp           |
|               | Rv | TCCAGGGGTTGGGCCTTTTCCT  |                 |
| PDGFRb        | Fw | CGCAAAGAAAGTGGGCGGCT    | 101 bp          |
|               | Rv | TGCAGGATGGAGCGGATGTGGT  |                 |
| VCAM-1        | Fw | TTGACTTGAGCACCACAGG     | 85 bp           |
|               | Rv | TCGTCACCTTCCATTCAGTG    |                 |
