# Supplementary material for: Cardiac glycosides target barrier inflammation of the vasculature, meninges and choroid plexus
Source: PubMed Central journal article supplement (PMC7910294; doi:10.1038/s42003-021-01787-x), 2021-02-26
Supplement: 42003_2021_1787_MOESM2_ESM.pdf [file 42003_2021_1787_MOESM2_ESM.pdf]

## **Description of Additional Supplementary Files**

**File name:** Supplementary Data 1

**Description:** Fig 1 raw data.xlsx

**File name:** Supplementary Data 2

**Description:** Fig 2 raw data.xlsx

**File name:** Supplementary Data 3

**Description:** Fig 3 raw data.xlsx

**File name:** Supplementary Data 4

**Description:** Fig 4 raw data.xlsx

**File name:** Supplementary Data 5

**Description:** Fig 5 and Fig S8 raw data.xlsx

**File name:** Supplementary Data 6

**Description:** Fig 6 raw data.xlsx

**File name:** Supplementary Data 7

**Description:** Fig 7 raw data.xlsx

**File name:** Supplementary Data 8

**Description:** Fig 8 raw data.xlsx

**File name:** Supplementary Data 9

**Description:** Fig S1 raw data.xlsx

**File name:** Supplementary Data 10

**Description:** Fig S2 raw data.xlsx

**File name:** Supplementary Data 11

**Description:** Fig S3 raw data.xlsx

**File name:** Supplementary Data 12

**Description:** Fig S4 raw data.xlsx

**File name:** Supplementary Data 13

**Description:** Fig S5 raw data.xlsx

**File name:** Supplementary Data 14

**Description:** Fig S7-10 raw data.xlsx

**File name:** Supplementary Data 15

**Description:** Raw data for Supplementary Figure 1 - Z-score analysis.
