# Supplementary material for: Cardiac glycosides target barrier inflammation of the vasculature, meninges and choroid plexus
Source: PubMed Central journal article supplement (PMC7910294; doi:10.1038/s42003-021-01787-x), 2021-02-26
Supplement: 42003_2021_1787_MOESM17_ESM.pdf [file 42003_2021_1787_MOESM17_ESM.pdf]

| Vehicle – CCL2 Intensity | Vehicle + IL1b – CCL2 Intensity | Vehicle – ICAM1 Intensity | Vehicle + IL1b - ICAM1 Intensity |       |
|--------------------------|---------------------------------|---------------------------|----------------------------------|-------|
| 23.47099812              | 103.1221596                     | 8.884944                  | 104.1636                         |       |
| 28.7321512               | 106.6094128                     | 16.63058                  | 100.9518                         |       |
| 25.5229916               | 94.74541166                     | 10.88392                  | 98.64578                         |       |
| 31.88303001              | 88.39424196                     | 19.38852                  | 90.46519                         |       |
| 22.38097446              | 114.7007015                     | 8.910441                  | 115.0879                         |       |
| 22.20597768              | 106.8288724                     | 7.776651                  | 108.045                          |       |
| 16.77714053              | 102.7606361                     | 5.236389                  | 131.2032                         |       |
| 23.44321622              | 98.85351854                     | 8.182408                  | 98.74832                         |       |
| 22.54136959              | 96.47767104                     | 8.147265                  | 99.83259                         |       |
| 24.45630207              | 95.12734801                     | 8.331453                  | 93.76803                         |       |
| 19.67447515              | 91.05165696                     | 6.993568                  | 85.84629                         |       |
| 21.22536147              | 95.336108                       | 7.10169                   | 93.86295                         |       |
| 25.51013506              | 85.98469682                     | 9.816627                  | 75.29108                         |       |
| 25.13464949              | 116.0790323                     | 11.15463                  | 118.94                           |       |
| 25.68836425              | 93.21345853                     | 10.41555                  | 97.07168                         |       |
| 20.65013201              | 95.21723766                     | 8.156227                  | 100.6159                         |       |
| 28.17602719              | 82.74161621                     | 10.84079                  | 78.69711                         |       |
| 23.96825732              | 94.15209188                     | 8.851324                  | 88.73469                         |       |
| 24.89940917              | 107.2534394                     | 8.768437                  | 102.1136                         |       |
| 16.76592433              | 96.29734519                     | 5.959633                  | 93.30912                         |       |
| 21.53121009              | 103.1536926                     | 7.67293                   | 103.1372                         |       |
| 23.64524785              | 101.0380921                     | 9.5296                    | 103.3502                         |       |
| 24.31173067              | 103.0019418                     | 9.26803                   | 94.58424                         |       |
| 62.01747242              | 97.68416749                     | 106.7276                  | 90.62958                         |       |
| 18.06266729              | 89.41565487                     | 5.948236                  | 82.06792                         |       |
| 14.75565912              | 91.80716302                     | 4.929993                  | 90.40333                         |       |
| 16.99059414              | 98.63846431                     | 5.71396                   | 99.04567                         |       |
| 24.06853084              | 106.3217472                     | 8.90637                   | 105.2632                         |       |
| 24.5884612               | 89.47270549                     | 8.897706                  | 82.24021                         |       |
| 39.53123541              | 105.2803241                     | 12.25676                  | 114.2487                         |       |
| 14.94111811              | 95.50194433                     | 5.321627                  | 93.64402                         |       |
| 15.1352896               | 93.0693762                      | 3.997793                  | 69.91604                         |       |
| 23.81860935              | 104.8822464                     | 8.76285                   | 106.6683                         |       |
| 24.83168873              | 105.2413294                     | 9.703495                  | 101.9382                         |       |
| 18.87570444              | 82.09041612                     | 7.386486                  | 85.05378                         |       |
| 18.41225146              | 93.61913147                     | 7.104876                  | 95.05888                         |       |
| 22.25648458              | 101.6578756                     | 8.510881                  | 100.3714                         |       |
| 20.80635695              | 99.67923455                     | 7.323312                  | 98.08697                         |       |
| 14.07102916              | 96.47270682                     | 4.781258                  | 94.86731                         |       |
| 21.05213333              | 95.09175635                     | 7.580109                  | 96.43263                         |       |
| 21.97069928              | 94.16340789                     | 8.104515                  | 93.76971                         |       |
| 20.10882747              | 97.60637685                     | 7.56939                   | 101.1148                         |       |
| 20.11144793              | 97.25137927                     | 7.020177                  | 96.70219                         |       |
| 28.31313632              | 95.97580731                     | 10.67933                  | 97.53963                         |       |
| 24.02378733              | 115.0009073                     | 9.22854                   | 136.7117                         |       |
| 25.39129854              | 92.64939582                     | 11.28214                  | 87.58032                         |       |
| 23.97906986              | 87.23376529                     | 9.458289                  | 86.81358                         |       |
| 20.46045669              | 97.25657193                     | 8.112005                  | 96.49497                         |       |
| 22.46156751              | 82.38570647                     | 8.888853                  | 78.79156                         |       |
| 21.77071352              | 93.46609834                     | 8.242948                  | 92.75515                         |       |
| 21.88707224              | 81.11140848                     | 8.613533                  | 77.87295                         |       |
| 17.69096273              | 95.82596706                     | 6.326209                  | 91.79071                         |       |
| 24.01889317              | 93.97383561                     | 7.834527                  | 93.36754                         |       |
| 21.81474715              | 93.22345951                     | 8.754108                  | 91.60497                         |       |
| 24.01407406              | 102.6242774                     | 9.291792                  | 107.2151                         |       |
| 22.79909767              | 107.6376647                     | 8.388213                  | 95.8595                          |       |
| 17.68673077              | 93.38601955                     | 5.780245                  | 93.92247                         |       |
| 15.48521661              | 93.1493858                      | 5.532613                  | 101.1401                         |       |
| 16.51562494              | 107.9455162                     | 5.534378                  | 119.8331                         |       |
| 23.19920693              | 103.0145527                     | 8.723085                  | 104.6996                         |       |
| 22.63247907              | 96.29612141                     | 8.383373                  | 97.24776                         |       |
| 23.64906649              | 97.07550284                     | 8.4932                    | 93.65256                         |       |
| 16.00049226              | 92.90104351                     | 5.271143                  | 98.13755                         |       |
| 14.56164935              | 94.27803007                     | 3.94766                   | 72.38145                         |       |
| Mean                     | 22.61                           | 97.24                     | 9.847                            | 96.71 |
| SD                       | 6.656                           | 7.583                     | 12.56                            | 12.09 |

Dataset 15 - Raw data for Supplementary Figure 1 – Z-score analysis
